# Supplementary material for: M2 macrophages predict worse long-term outcomes in human acute tubular necrosis
Source: PubMed Central journal article supplement (PMC7005727; doi:10.1038/s41598-020-58725-w), 2020-02-07
Supplement: 41598_2020_58725_MOESM1_ESM.pdf [file 41598_2020_58725_MOESM1_ESM.pdf]

## **M2 macrophages predict worse long-term outcome in human acute tubular necrosis**

Myung-Gyu Kim<sup>1†</sup>, Kijoon Lim<sup>1†</sup>, Yoo Jin Lee<sup>2</sup>, Jihyun Yang<sup>1</sup>, Se Won Oh<sup>1</sup>, Won Yong Cho<sup>1</sup> and Sang-Kyung Jo<sup>1\*</sup>

<sup>1</sup>Division of Nephrology, Department of Internal Medicine, Korea University Anam Hospital, Republic of Korea

<sup>2</sup>Department of Pathology, Korea University Anam Hospital, Republic of Korea

<sup>†</sup>These authors contributed equally to this work.

\*Corresponding author:

Sang-Kyung Jo, MD. PhD,

Professor

Department of Internal Medicine, Korea University Medical College

Address: Korea University Anam Hospital, 5Ka, Anam-Dong, Sungbuk-Gu, Seoul, Republic of Korea

Tel: 82-2-920-5475; Fax: 82-2-927-5344; E-mail: sang-kyung@korea.ac.kr

## Supplementary Figure S1

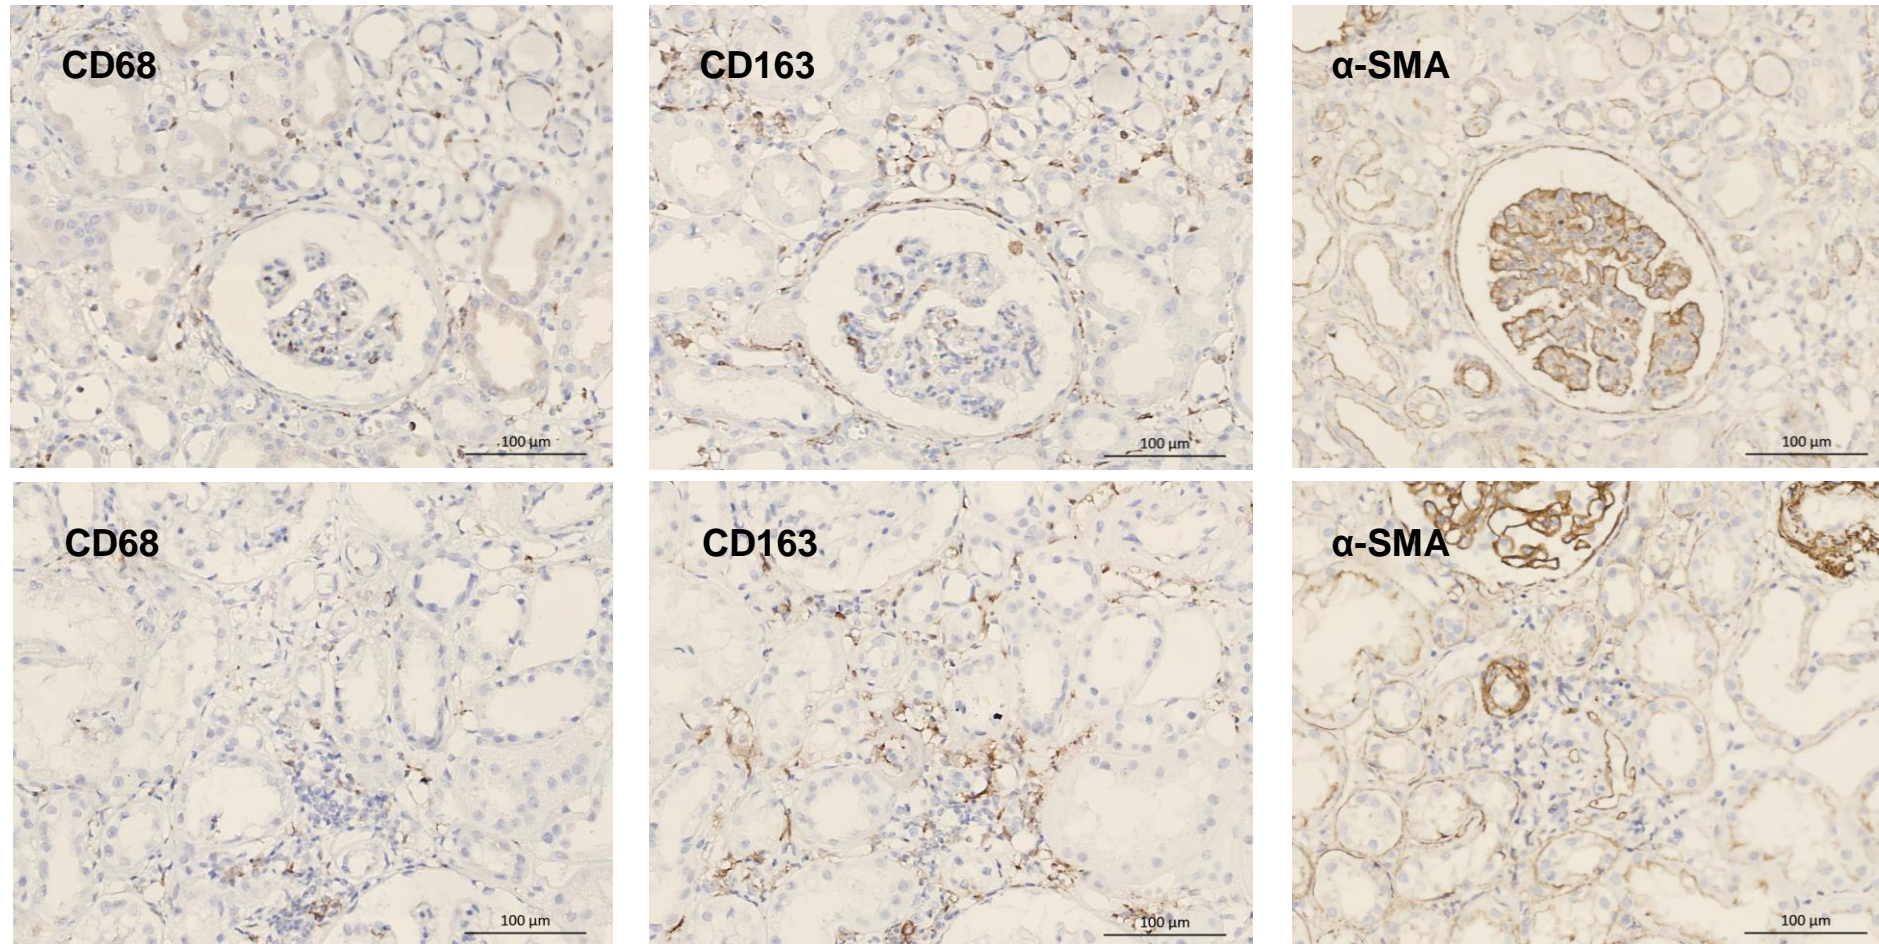

**Supplementary Figure S1.** Immunohistochemical stainings for CD68, CD163 and  $\alpha$ -SMA,  $\alpha$ -SMA immunoreactivity was mostly found in glomeruli, arteriole and also in some tubular basement membrane but not in the interstitium where CD68+ and CD163+ cells were found (bar = 100  $\mu$ m).

## Supplementary Figure S2

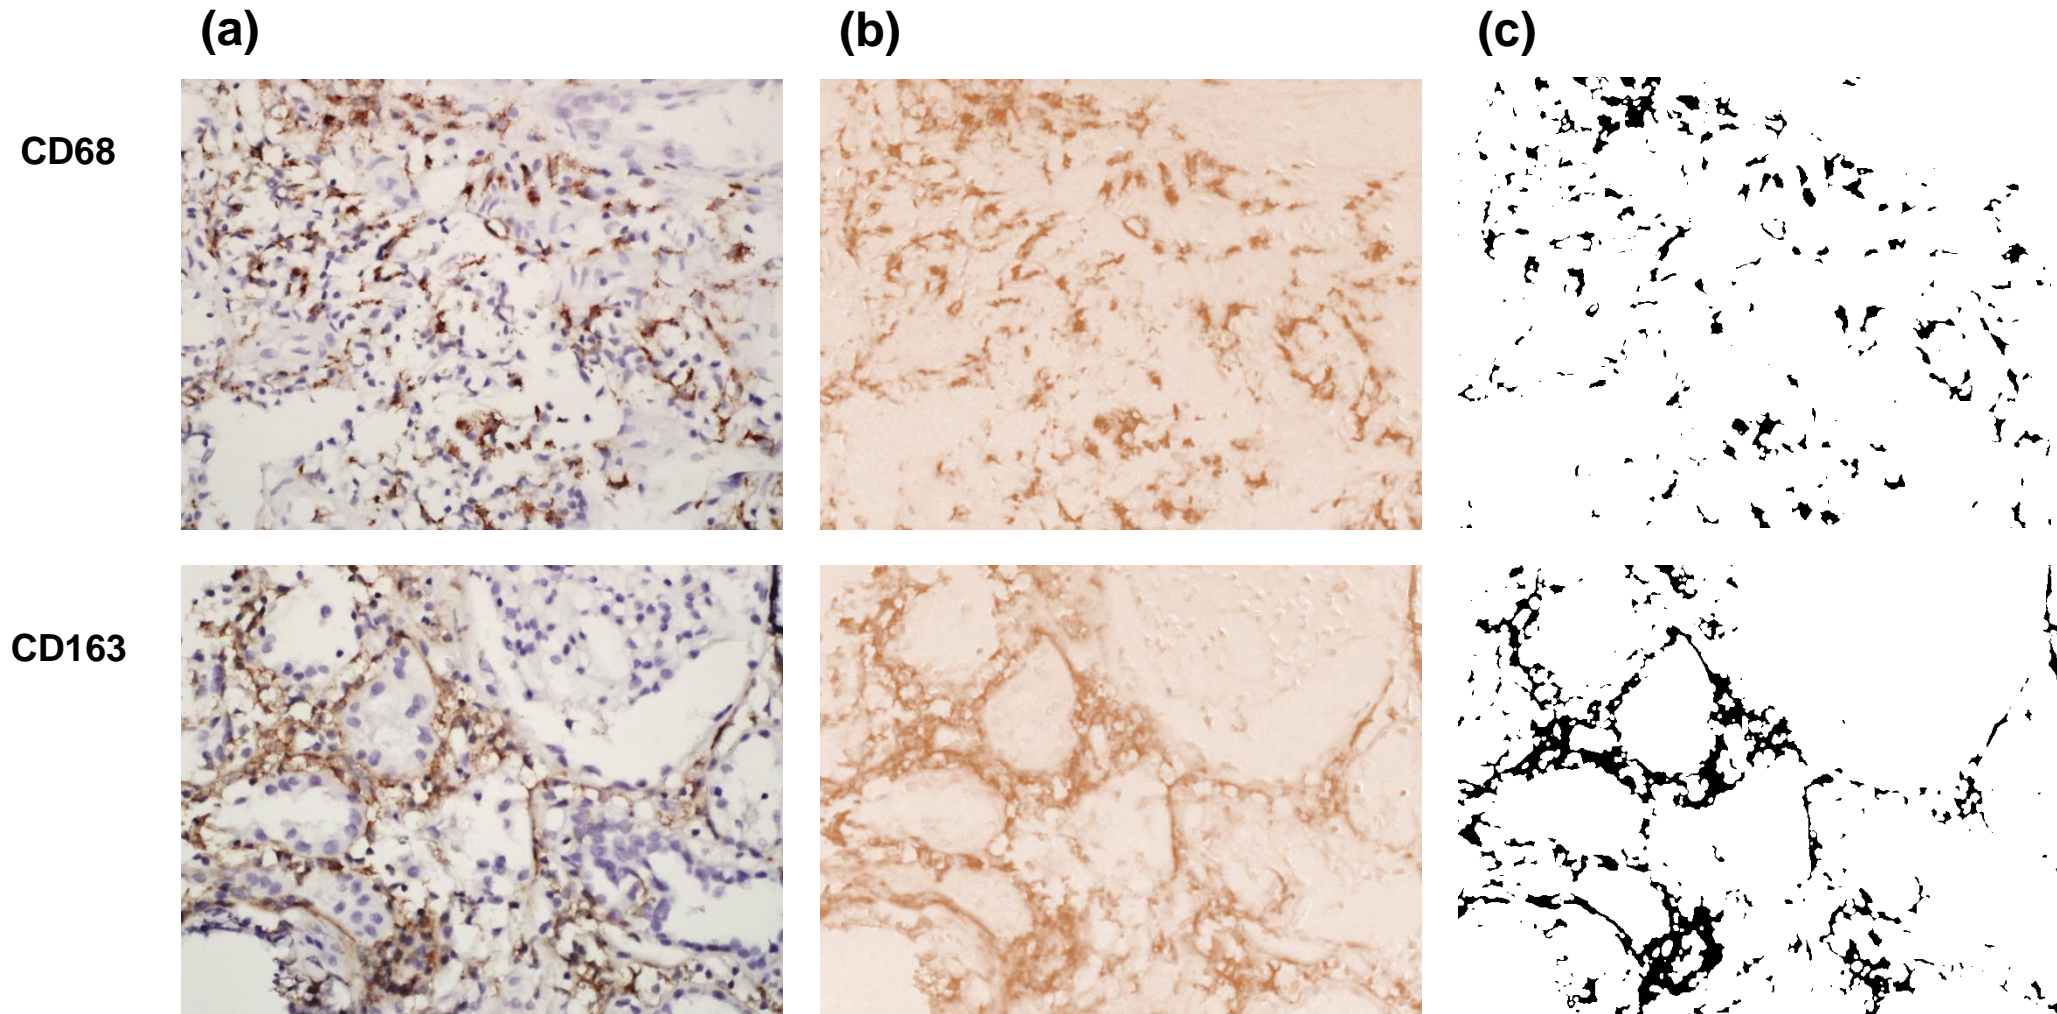

**Supplementary Figure S2. Quantification of renal macrophage densities**, Using Fiji software, a color deconvolution was performed to separate the brown color stained area, representing the existence of CD68 or CD163, from a hematoxylin background (a, b) and then the area exceeding the set threshold (black color) was quantified (c).

Supplementary Table 1. Impact of CD68+cells infiltration on renal outcome

| CD68                             |                    | 1mo eGFR    |             |       | 3mo eGFR    |             |       | AKI recovery* |             |       |
|----------------------------------|--------------------|-------------|-------------|-------|-------------|-------------|-------|---------------|-------------|-------|
|                                  |                    | eGFR <45    | eGFR >45    | P     | eGFR <45    | eGFR >45    | P     | Non-recovery  | recovery    | P     |
| Total                            |                    | 1.95 ± 2.36 | 1.42 ± 2.29 | 0.368 | 1.19 ± 1.48 | 1.56 ± 2.13 | 0.476 | 1.72 ± 2.17   | 1.58 ± 2.34 | 0.831 |
| AKI type                         | Native AKI         | 3.21 ± 2.84 | 2.24 ± 3.15 | 0.440 | 2.26 ± 1.46 | 2.61 ± 2.80 | 0.815 | 3.85 ± 2.47   | 2.28 ± 3.05 | 0.293 |
|                                  | Deceased donor AKI | 1.14 ± 1.63 | 0.88 ± 1.28 | 0.573 | 4.55 ± 2.32 | 3.47 ± 1.96 | 0.969 | 0.54 ± 0.41   | 1.07 ± 1.53 | 0.310 |
| AKI severity                     | Stage 1            | 0.77 ± 0.60 | 1.06 ± 1.55 | 0.635 | 0.81 ± 0.61 | 1.09 ± 1.67 | 0.619 | 0.57 ± 0.48   | 1.07 ± 1.47 | 0.469 |
|                                  | Stage 2,3          | 2.47 ± 2.66 | 1.65 ± 2.66 | 0.332 | 1.51 ± 1.90 | 1.89 ± 2.38 | 0.638 | 2.36 ± 2.50   | 1.85 ± 2.68 | 0.614 |
| biopsy time from peak creatinine | ≤2days             | 1.20 ± 1.84 | 0.86 ± 1.31 | 0.514 | 0.96 ± 1.60 | 1.02 ± 1.49 | 0.910 | 0.44 ± 0.41   | 1.06 ± 1.58 | 0.316 |
|                                  | >2days             | 2.63 ± 2.64 | 2.20 ± 3.07 | 0.688 | 1.60 ± 1.21 | 2.26 ± 2.64 | 0.509 | 2.99 ± 2.49   | 2.20 ± 2.93 | 0.517 |

Values are presented as mean ± standard deviation

\*AKI recovery was defined as recovery to within 25% of baseline eGFR during follow-up

Supplementary Table 2. Impact of CD163+ cell infiltration on renal outcome

| CD163                            |                    | 1-month eGFR |             |         | 3-month eGFR |             |         | AKI recovery* |             |         |
|----------------------------------|--------------------|--------------|-------------|---------|--------------|-------------|---------|---------------|-------------|---------|
|                                  |                    | eGFR < 45    | eGFR > 45   | P-value | eGFR < 45    | eGFR > 45   | P-value | Non-recovery  | Recovery    | P-value |
| Total                            |                    | 4.89 ± 2.85  | 3.22 ± 2.10 | 0.007   | 4.43 ± 2.40  | 3.52 ± 1.98 | 0.116   | 5.61 ± 3.24   | 3.44 ± 2.27 | 0.004   |
| AKI type                         | Native AKI         | 5.16 ± 3.64  | 2.75 ± 2.24 | 0.039   | 3.91 ± 3.08  | 3.61 ± 2.09 | 0.820   | 7.54 ± 3.98   | 2.99 ± 2.44 | 0.002   |
|                                  | Deceased donor AKI | 4.72 ± 2.35  | 3.53 ± 1.99 | 0.092   | 4.55 ± 2.32  | 3.47 ± 1.96 | 0.107   | 4.53 ± 2.32   | 3.75 ± 2.11 | 0.343   |
| AKI severity                     | Stage 1            | 4.55 ± 2.16  | 3.40 ± 1.97 | 0.210   | 3.77 ± 1.58  | 3.67 ± 2.34 | 0.893   | 4.39 ± 2.09   | 3.54 ± 2.05 | 0.418   |
|                                  | Stage 2,3          | 5.04 ± 3.16  | 3.11 ± 2.21 | 0.021   | 4.98 ± 2.87  | 3.42 ± 1.73 | 0.104   | 6.28 ± 3.66   | 3.38 ± 2.40 | 0.006   |
| biopsy time from peak creatinine | ≤2days             | 5.12 ± 2.51  | 2.96 ± 1.84 | 0.005   | 4.54 ± 2.32  | 3.32 ± 2.01 | 0.104   | 4.14 ± 2.01   | 3.44 ± 2.30 | 0.458   |
|                                  | >2days             | 4.68 ± 3.23  | 3.60 ± 2.42 | 0.288   | 4.24 ± 2.69  | 3.78 ± 1.97 | 0.631   | 7.06 ± 3.69   | 3.44 ± 2.26 | 0.003   |

Values are presented as mean ± standard deviation

\*AKI recovery was defined as recovery to within 25% of baseline eGFR during follow-up
